# Supplementary material for: El análisis de los tipos hipotecarios en la UE: elementos a tener en cuenta
Source: Royal Society of Chemistry journal article supplement (doi:10.1039/c2nr32092d), 2009-01-01
Supplement: c2nr32092d.pdf [file c2nr32092d.pdf]

## Supporting Information

### **Mussel-inspired functionalization of graphene for synthesizing Ag-polydopamine-graphene nanosheets as antibacterial materials**

*Zhe Zhang, Jing Zhang, Bailin Zhang, and Jilin Tang\**

State Key Laboratory of Electroanalytical Chemistry, Changchun Institute of Applied  
Chemistry, Chinese Academy of Sciences, Changchun 130022, (P. R. China)

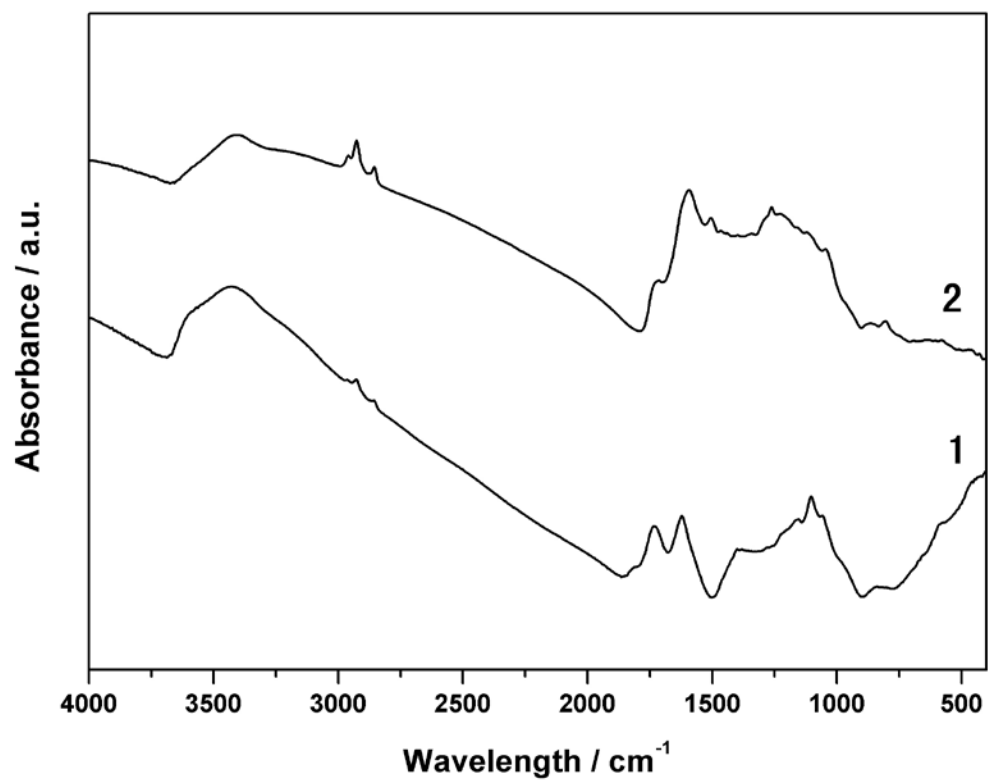

**Fig. S1.** FTIR spectra of GO (1) and PDA-GNS (2).

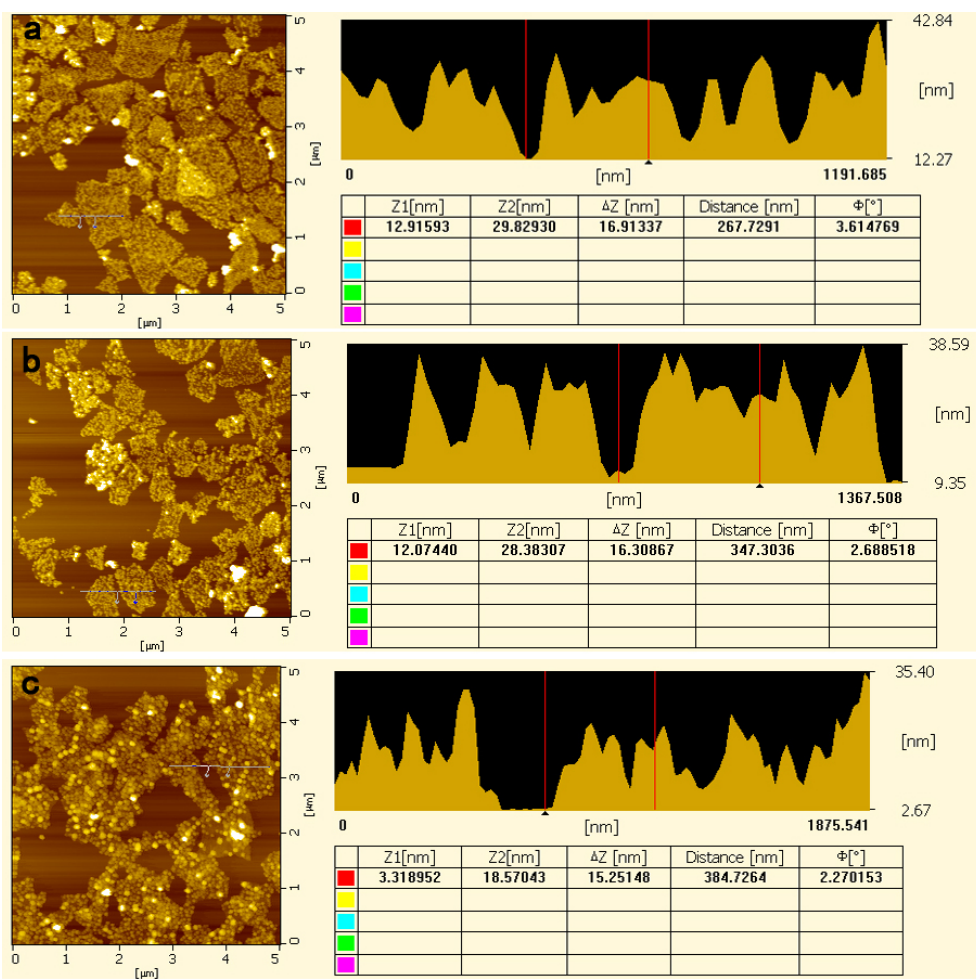

**Fig. S2.** AFM images of Ag-PDA-GNS-30 (a), Ag-PDA-GNS-40 (b), and Ag-PDA-GNS-50 (c). In right the cross-sections identified by the lines in (a), (b), and (c) show the heights of Ag-PDA-GNS, respectively.

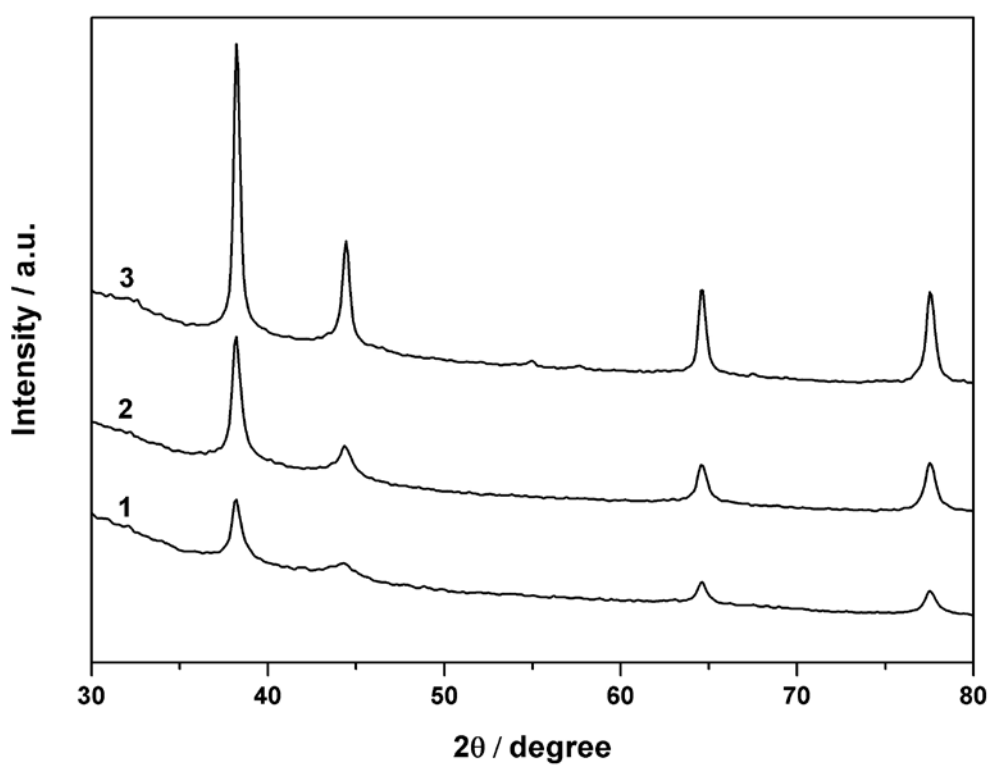

**Fig. S3.** XRD patterns of Ag-PDA-GNS-30 (1), Ag-PDA-GNS-40 (2), and Ag-PDA-GNS-50 (3).

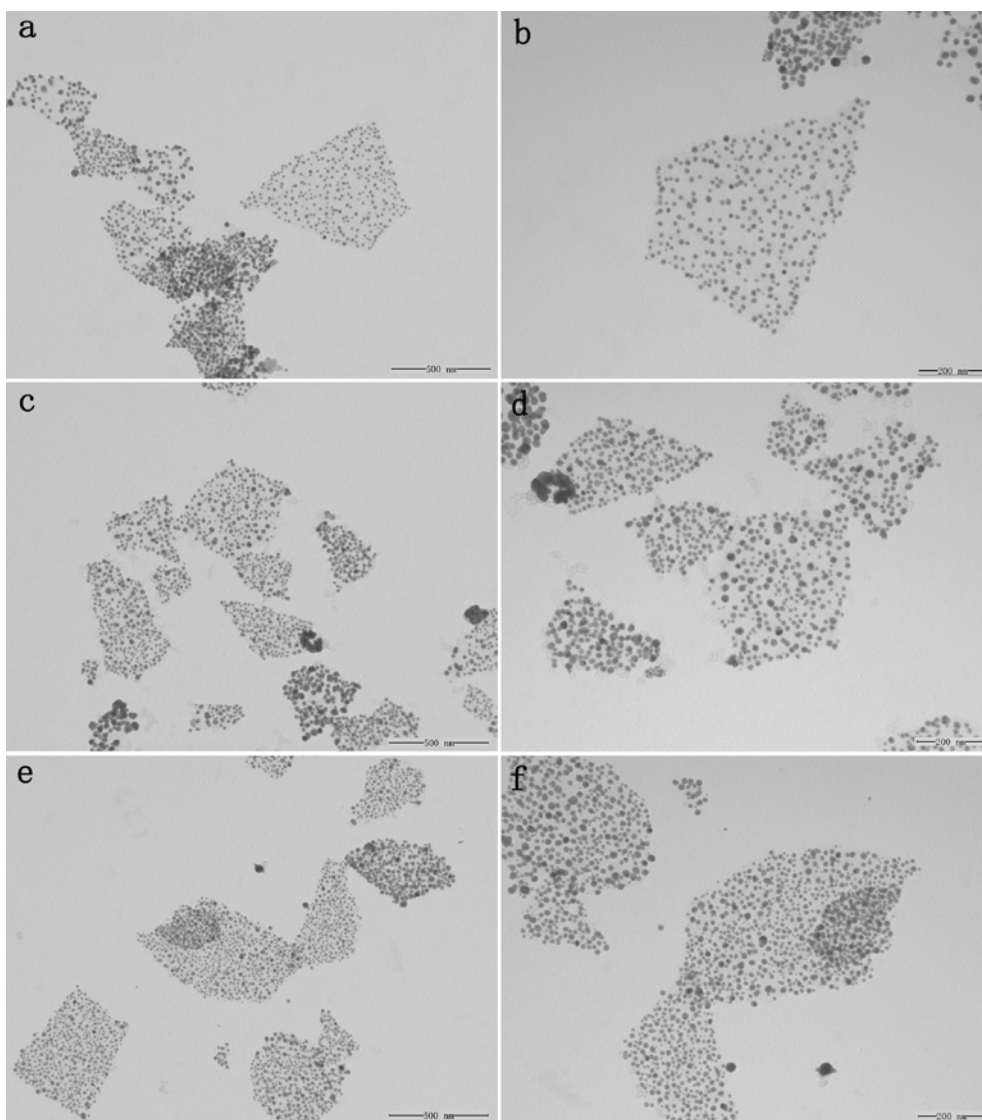

**Fig. S4.** TEM images of Ag-PDA-GNS-30 (a, b), Ag-PDA-GNS-40 (c, d), and Ag-PDA-GNS-50 (e, f).

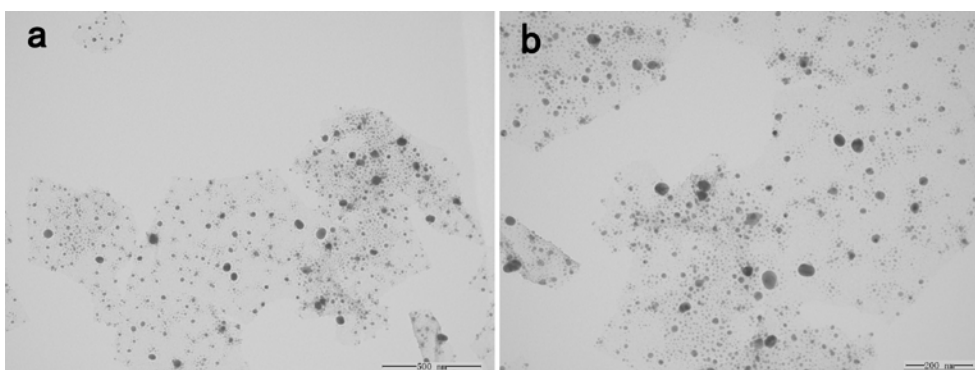

**Fig. S5.** TEM images of Ag-PDA-GNS synthesized by the PDA layer on the surface of GNS as a reducing agent with 50 mg AgNO<sub>3</sub> added.

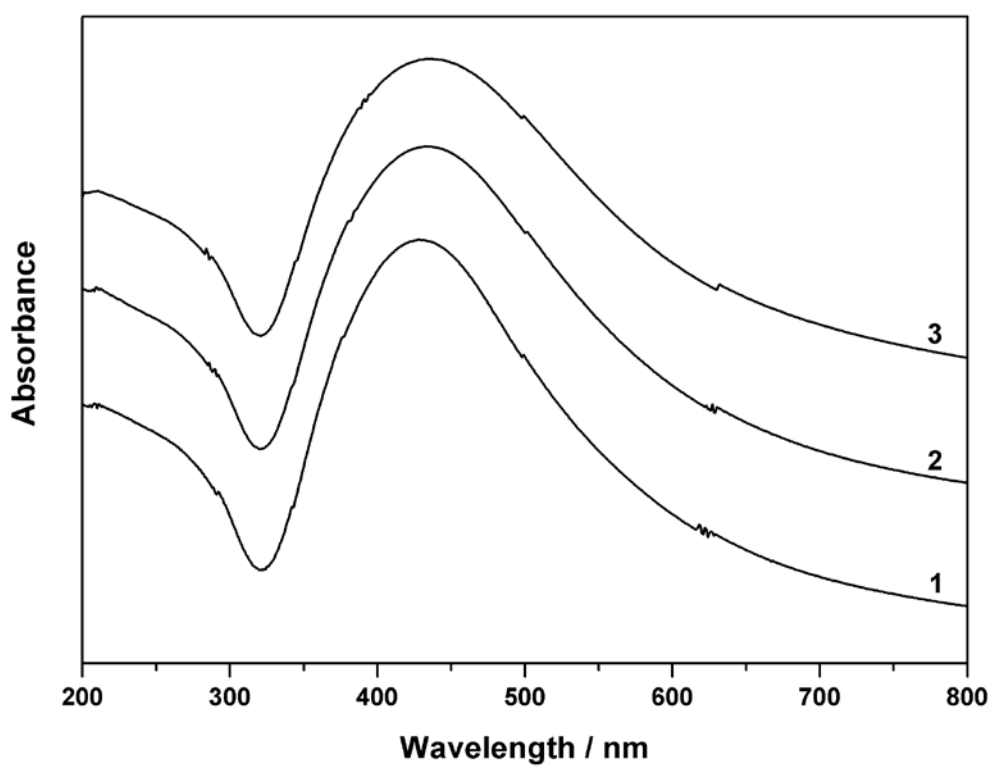

**Fig. S6.** UV-vis absorption spectra of Ag-PDA-GNS-30 (1), Ag-PDA-GNS-40 (2), and Ag-PDA-GNS-50 (3).

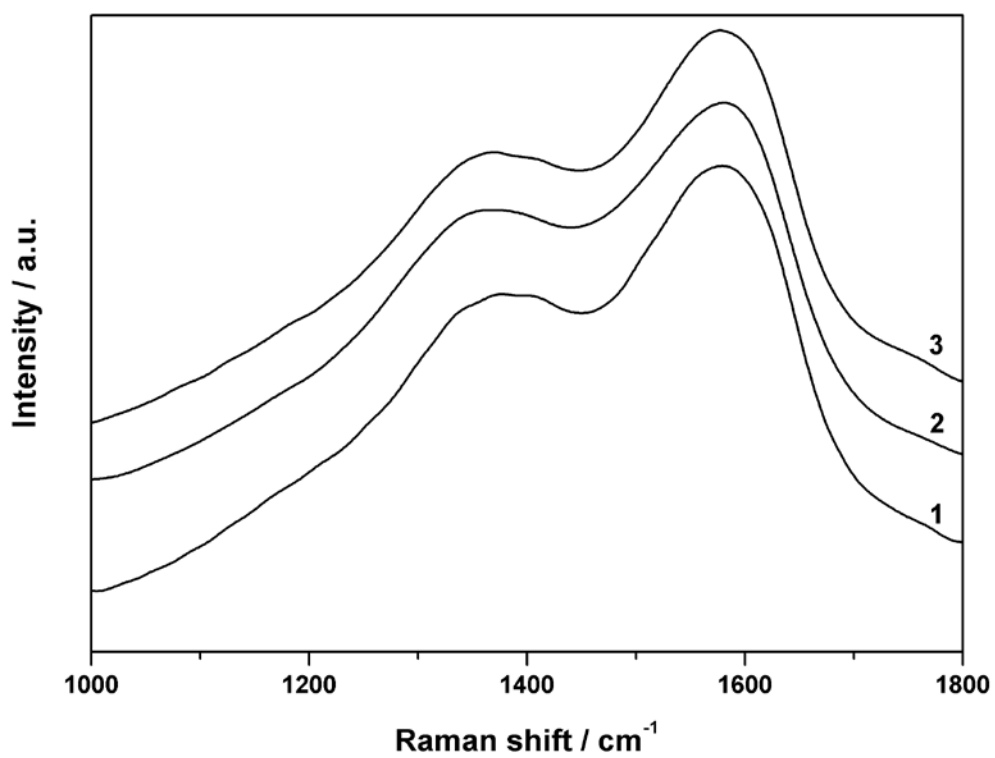

**Fig. S7.** Raman spectra of Ag-PDA-GNS-30 (1), Ag-PDA-GNS-40 (2), and Ag-PDA-GNS-50 (3).



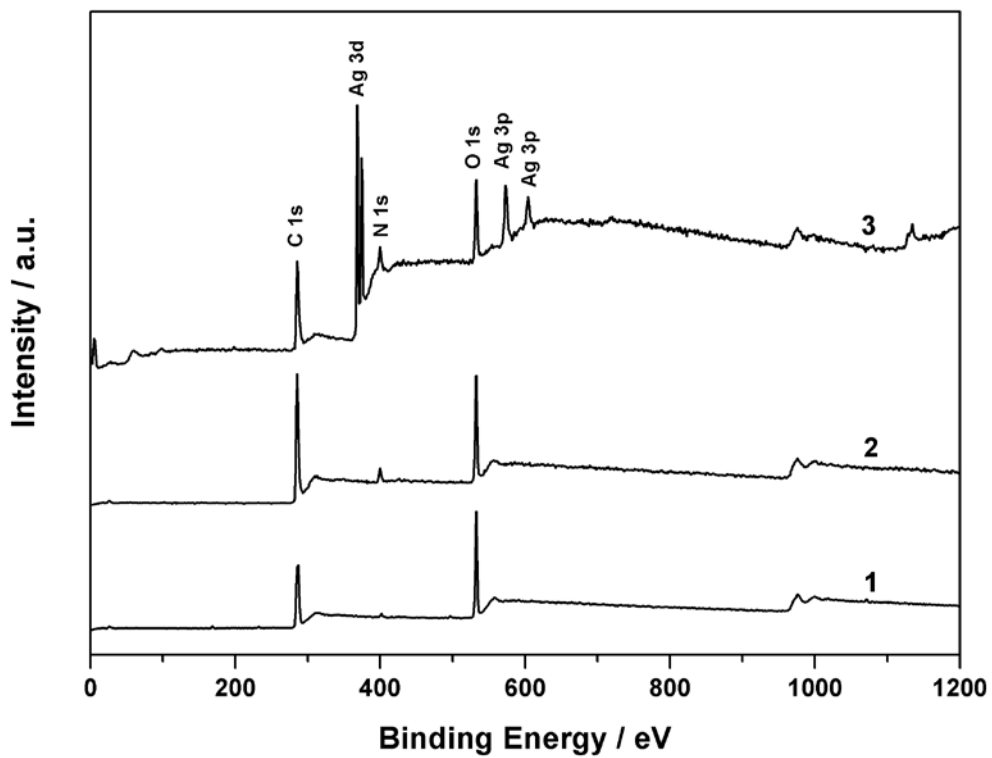

**Fig. S8.** XPS general spectra of GO (1), PDA-GNS (2), and Ag-PDA-GNS-50 (3).

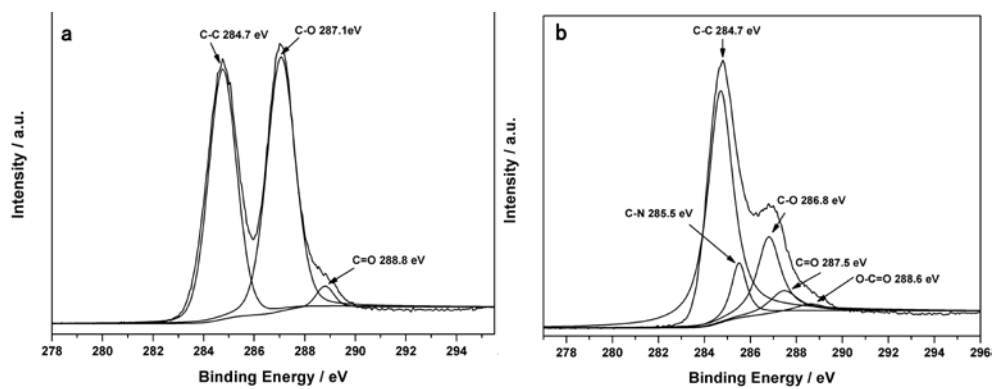

**Fig. S9.** C 1s XPS spectra of GO (a) and PDA-GNS (b).

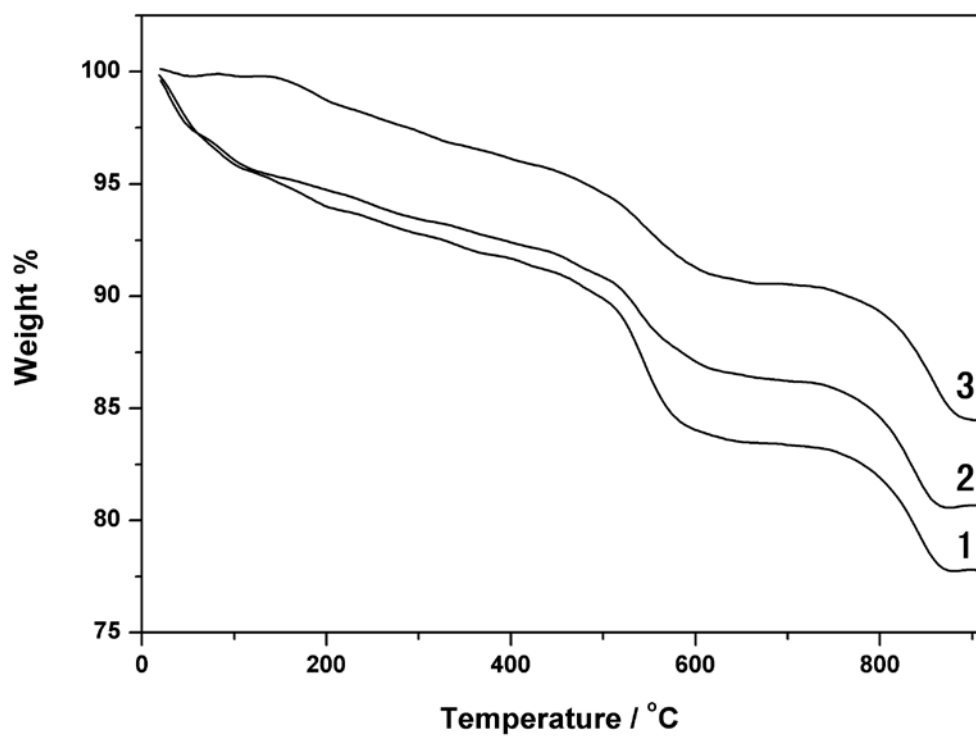

**Fig. S10.** TGA curves of Ag-PDA-GNS-30 (1), Ag-PDA-GNS-40 (2), and Ag-PDA-GNS-50 (3).

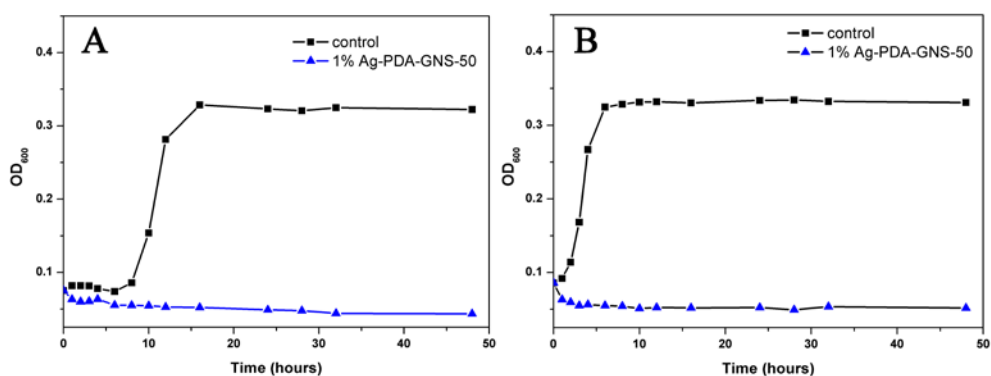

**Fig. S11.** Bacterial growth curves in LB media with the Ag-PDA-GNS. 1% (v/v) active substances of Ag-PDA-GNS was added to the culture of *E.coli* (A) and *B.subtilis* (B). The growth of the bacteria was measured by the OD at 600 nm wavelength. The initial addition of Ag-PDA-GNS to the LB bacterium suspension was regarded as the starting point.
